# Supplementary material for: Transcriptome Analysis Provides Insights into Lignin Biosynthesis in Styrax tonkinensis Branches
Source: MDPI journal article supplement (doi:10.3390/f15040601), 2024-03-26
Supplement: s1 [file s1]

# Supplementary Materials

**Table S1.** Primers used for quantitative real-time PCR (qRT-PCR) analysis.

| Gene id                         | Gene Name  | Forward Primer (5'-3')        | Reverse Primer (3'-5')          |
|---------------------------------|------------|-------------------------------|---------------------------------|
| TRIN-<br>ITY_DN34241_c0_g1_i4_3 | COMT       | 5'-GTCAACAAGCGAGCACCAA-3'     | 5'-GCCGACTTCAGCACCATC-3'        |
| TRIN-<br>ITY_DN7922_c0_g1_i1_2  | peroxidase | 5'-CGGTTCAAAGGGAGAGA-TACGA-3' | 5'-ATCAAGAGGCTGGACAATT-AGACT-3' |
| TRIN-<br>ITY_DN21407_c0_g1_i2_3 | CCoAOMT    | 5'-CGCCGCATCAGCTAATCAAC-3'    | 5'-AAGCATCAGCATTTCAG-GAACAAC-3' |
| TRIN-<br>ITY_DN24371_c0_g1_i1_3 | CCoAOMT    | 5'-GACCACAACGAAGAA-GCAAACA-3' | 5'-GACCAGCATCAGGAGCAGTA-3'      |
| TRIN-<br>ITY_DN32751_c0_g1_i5_6 | COMT       | 5'-GACCGCTCAC-TCTGTGTTCTCA-3' | 5'-tcagttcataccacaagtccatca-3'  |
| TRIN-<br>ITY_DN36612_c0_g2_i7_6 | COMT       | 5'-GCACCACATCACCAC-TATTACC-3' | 5'-ACCAGAGCAGCCAGAGTTG-3'       |
| TRIN-<br>ITY_DN28925_c0_g3_i3_5 | F5H        | 5'-ACGCCATCAGACTTACGAGAG-3'   | 5'-GCTCCTGCTGGACCTTCTT-3'       |
| TRIN-<br>ITY_DN32196_c0_g1_i3_6 | F5H        | 5'-CCAGGCAGTATGGAG-GAATCTT-3' | 5'-CGGTCTGTAGGTGAGGTAGC-3'      |

**Table S2.** Summary of sequencing data quality preprocessing results.

| Sample    | RawReads(M) | RawBases(G) | CleanReads(M) | CleanBases(G) | ValidBases(%) | Q30 (%) | GC (%) |
|-----------|-------------|-------------|---------------|---------------|---------------|---------|--------|
| Jul CYB 1 | 47.85       | 7.18        | 47.27         | 6.83          | 95.13         | 94.13   | 47.11  |
| Jul CYB 2 | 48.41       | 7.26        | 47.68         | 6.84          | 94.26         | 94.07   | 47.01  |
| Jul CYB 3 | 47.9        | 7.19        | 47.03         | 6.75          | 93.88         | 94.05   | 47.06  |
| Jul TYB 1 | 48.56       | 7.28        | 47.61         | 6.82          | 93.69         | 94.05   | 46.99  |
| Jul TYB 2 | 50.1        | 7.51        | 49.4          | 7.16          | 95.3          | 94.03   | 47.1   |
| Jul TYB 3 | 49.61       | 7.44        | 48.69         | 6.96          | 93.5          | 94.03   | 47.28  |
| Oct CYB 1 | 49.87       | 7.48        | 49.02         | 6.93          | 92.64         | 93.78   | 46.71  |
| Oct CYB 2 | 47.49       | 7.12        | 46.66         | 6.7           | 94.01         | 93.8    | 46.64  |
| Oct CYB 3 | 47.71       | 7.16        | 46.72         | 6.63          | 92.69         | 93.68   | 46.56  |
| Oct TYB 1 | 49.54       | 7.43        | 48.69         | 6.97          | 93.83         | 93.95   | 46.82  |
| Oct TYB 2 | 51.07       | 7.66        | 50.12         | 7.09          | 92.49         | 94.04   | 46.65  |
| Oct TYB 3 | 49.94       | 7.49        | 49.09         | 7.04          | 93.92         | 93.94   | 46.5   |
| Sep CYB 1 | 49.65       | 7.45        | 48.76         | 6.96          | 93.4          | 94.12   | 46.83  |
| Sep CYB 2 | 50.07       | 7.51        | 49.18         | 7.02          | 93.52         | 94.19   | 47     |
| Sep CYB 3 | 51.34       | 7.7         | 50.42         | 7.16          | 92.95         | 93.73   | 46.69  |
| Sep TYB 1 | 47.65       | 7.15        | 46.7          | 6.64          | 92.87         | 93.63   | 46.4   |
| Sep TYB 2 | 51.43       | 7.71        | 50.46         | 7.22          | 93.63         | 93.74   | 46.89  |
| Sep TYB 3 | 50.15       | 7.52        | 49.28         | 7.06          | 93.8          | 93.76   | 46.82  |

**Table S3.** DEGs selected from lignin biosynthesis process.

| Sample                | Group             | Gene_id                          | Regulation | KEGG gene name  | KEGG description                                 |
|-----------------------|-------------------|----------------------------------|------------|-----------------|--------------------------------------------------|
| current-year branches | July vs September | TRIN-<br>ITY_DN24371_c0_g1_i1_3  | Up         | E2.1.1.104      | caffeoyl-CoA O-methyltransferase [EC:2.1.1.104]  |
|                       |                   | TRIN-<br>ITY_DN2499_c0_g1_i2_6   | Down       | E1.11.1.7       | peroxidase [EC:1.11.1.7]                         |
|                       |                   | TRIN-<br>ITY_DN29459_c1_g1_i1_2  | Down       | CAD             | cinnamyl-alcohol dehydrogenase [EC:1.1.1.195]    |
|                       |                   | TRIN-<br>ITY_DN31775_c0_g2_i1_2  | Up         | E2.1.1.68, COMT | caffeic acid 3-O-methyltransferase [EC:2.1.1.68] |
|                       |                   | TRIN-<br>ITY_DN36612_c0_g2_i7_6  | Up         | E2.1.1.68, COMT | caffeic acid 3-O-methyltransferase [EC:2.1.1.68] |
|                       |                   | TRIN-<br>ITY_DN36853_c2_g1_i10_6 | Up         | bglB            | beta-glucosidase [EC:3.2.1.21]                   |
|                       |                   | TRIN-<br>ITY_DN7922_c0_g1_i1_2   | Down       | E1.11.1.7       | peroxidase [EC:1.11.1.7]                         |
|                       | July vs October   | TRIN-<br>ITY_DN11357_c0_g1_i4_1  | Down       | CAD             | cinnamyl-alcohol dehydrogenase [EC:1.1.1.195]    |

|                   |                      |                                  |      |                 |                                                  |
|-------------------|----------------------|----------------------------------|------|-----------------|--------------------------------------------------|
| biennial branches | September vs October | TRIN-<br>ITY_DN21407_c0_g1_i2_3  | Up   | E2.1.1.104      | caffeoyl-CoA O-methyltransferase [EC:2.1.1.104]  |
|                   |                      | TRIN-<br>ITY_DN24371_c0_g1_i1_3  | Up   | E2.1.1.104      | caffeoyl-CoA O-methyltransferase [EC:2.1.1.104]  |
|                   |                      | TRIN-<br>ITY_DN24407_c0_g1_i2_2  | Down | E2.1.1.68, COMT | caffeic acid 3-O-methyltransferase [EC:2.1.1.68] |
|                   |                      | TRIN-<br>ITY_DN28925_c0_g3_i3_5  | Down | CYP84A, F5H     | ferulate-5-hydroxylase [EC:1.14.-.-]             |
|                   |                      | TRIN-<br>ITY_DN32196_c0_g1_i3_6  | Down | CYP84A, F5H     | ferulate-5-hydroxylase [EC:1.14.-.-]             |
|                   |                      | TRIN-<br>ITY_DN32751_c0_g1_i5_6  | Up   | E2.1.1.68, COMT | caffeic acid 3-O-methyltransferase [EC:2.1.1.68] |
|                   |                      | TRIN-<br>ITY_DN32831_c1_g5_i11_5 | Up   | bglB            | beta-glucosidase [EC:3.2.1.21]                   |
|                   |                      | TRIN-<br>ITY_DN34241_c0_g1_i4_3  | Down | E2.1.1.68, COMT | caffeic acid 3-O-methyltransferase [EC:2.1.1.68] |
|                   |                      | TRIN-<br>ITY_DN35266_c0_g2_i1_2  | Down | CYP84A, F5H     | ferulate-5-hydroxylase [EC:1.14.-.-]             |
|                   |                      | TRIN-<br>ITY_DN36612_c0_g2_i7_6  | Up   | E2.1.1.68, COMT | caffeic acid 3-O-methyltransferase [EC:2.1.1.68] |
|                   |                      | TRIN-<br>ITY_DN36853_c2_g1_i10_6 | Up   | bglB            | beta-glucosidase [EC:3.2.1.21]                   |
|                   |                      | TRIN-<br>ITY_DN7922_c0_g1_i1_2   | Down | E1.11.1.7       | peroxidase [EC:1.11.1.7]                         |
|                   |                      | TRIN-<br>ITY_DN9868_c0_g1_i1_4   | Up   | E2.1.1.104      | caffeoyl-CoA O-methyltransferase [EC:2.1.1.104]  |
|                   |                      | TRIN-<br>ITY_DN24407_c0_g1_i2_2  | Down | E2.1.1.68, COMT | caffeic acid 3-O-methyltransferase [EC:2.1.1.68] |
|                   |                      | TRIN-<br>ITY_DN2499_c0_g1_i2_6   | Up   | E1.11.1.7       | peroxidase [EC:1.11.1.7]                         |
|                   |                      | TRIN-<br>ITY_DN28925_c0_g3_i3_5  | Down | CYP84A, F5H     | ferulate-5-hydroxylase [EC:1.14.-.-]             |
|                   |                      | TRIN-<br>ITY_DN32196_c0_g1_i3_6  | Down | CYP84A, F5H     | ferulate-5-hydroxylase [EC:1.14.-.-]             |
|                   |                      | TRIN-<br>ITY_DN32831_c1_g5_i11_5 | Up   | bglB            | beta-glucosidase [EC:3.2.1.21]                   |
|                   |                      | TRIN-<br>ITY_DN34241_c0_g1_i4_3  | Down | E2.1.1.68, COMT | caffeic acid 3-O-methyltransferase [EC:2.1.1.68] |
|                   |                      | TRIN-<br>ITY_DN35266_c0_g2_i1_2  | Down | CYP84A, F5H     | ferulate-5-hydroxylase [EC:1.14.-.-]             |
|                   |                      | TRIN-<br>ITY_DN36853_c2_g1_i10_6 | Up   | bglB            | beta-glucosidase [EC:3.2.1.21]                   |
| biennial branches | July vs September    | TRIN-<br>ITY_DN24371_c0_g1_i1_3  | Up   | E2.1.1.104      | caffeoyl-CoA O-methyltransferase [EC:2.1.1.104]  |
|                   |                      | TRIN-<br>ITY_DN36612_c0_g2_i7_6  | Up   | E1.11.1.7       | peroxidase [EC:1.11.1.7]                         |
|                   |                      | TRIN-<br>ITY_DN21407_c0_g1_i2_3  | Up   | E2.1.1.104      | caffeoyl-CoA O-methyltransferase [EC:2.1.1.104]  |
|                   |                      | TRIN-<br>ITY_DN24371_c0_g1_i1_3  | Up   | E2.1.1.104      | caffeoyl-CoA O-methyltransferase [EC:2.1.1.104]  |
|                   | July vs October      | TRIN-<br>ITY_DN24407_c0_g1_i2_2  | Down | E2.1.1.68, COMT | caffeic acid 3-O-methyltransferase [EC:2.1.1.68] |
|                   |                      | TRIN-<br>ITY_DN28925_c0_g3_i3_5  | Down | CYP84A, F5H     | ferulate-5-hydroxylase [EC:1.14.-.-]             |
|                   |                      | TRIN-<br>ITY_DN32196_c0_g1_i3_6  | Down | CYP84A, F5H     | ferulate-5-hydroxylase [EC:1.14.-.-]             |
|                   |                      | TRIN-<br>ITY_DN32751_c0_g1_i5_6  | Up   | E2.1.1.68, COMT | caffeic acid 3-O-methyltransferase [EC:2.1.1.68] |
|                   |                      | TRIN-<br>ITY_DN32831_c1_g5_i11_5 | Up   | bglB            | beta-glucosidase [EC:3.2.1.21]                   |
|                   |                      | TRIN-<br>ITY_DN36612_c0_g2_i7_6  | Up   | E2.1.1.68, COMT | caffeic acid 3-O-methyltransferase [EC:2.1.1.68] |
|                   | September vs October | TRIN-<br>ITY_DN36853_c2_g1_i10_6 | Up   | bglB            | beta-glucosidase [EC:3.2.1.21]                   |
|                   |                      | TRIN-<br>ITY_DN7922_c0_g1_i1_2   | Down | E1.11.1.7       | peroxidase [EC:1.11.1.7]                         |
|                   |                      | TRIN-<br>ITY_DN24407_c0_g1_i2_2  | Down | E2.1.1.68, COMT | caffeic acid 3-O-methyltransferase [EC:2.1.1.68] |
|                   |                      |                                  |      |                 |                                                  |

|                                  |      |                    |                                                     |
|----------------------------------|------|--------------------|-----------------------------------------------------|
| TRIN-<br>ITY_DN2499_c0_g1_i2_6   | Up   | E1.11.1.7          | peroxidase [EC:1.11.1.7]                            |
| TRIN-<br>ITY_DN28925_c0_g3_i3_5  | Down | CYP84A, F5H        | ferulate-5-hydroxylase [EC:1.14.-.-]                |
| TRIN-<br>ITY_DN32196_c0_g1_i3_6  | Down | CYP84A, F5H        | ferulate-5-hydroxylase [EC:1.14.-.-]                |
| TRIN-<br>ITY_DN32831_c1_g5_i11_5 | Up   | bglB               | beta-glucosidase [EC:3.2.1.21]                      |
| TRIN-<br>ITY_DN34241_c0_g1_i4_3  | Down | E2.1.1.68,<br>COMT | caffeic acid 3-O-methyltransferase<br>[EC:2.1.1.68] |
| TRIN-<br>ITY_DN35266_c0_g2_i1_2  | Down | CYP84A, F5H        | ferulate-5-hydroxylase [EC:1.14.-.-]                |
| TRIN-<br>ITY_DN36853_c2_g1_i10_6 | Up   | bglB               | beta-glucosidase [EC:3.2.1.21]                      |

---

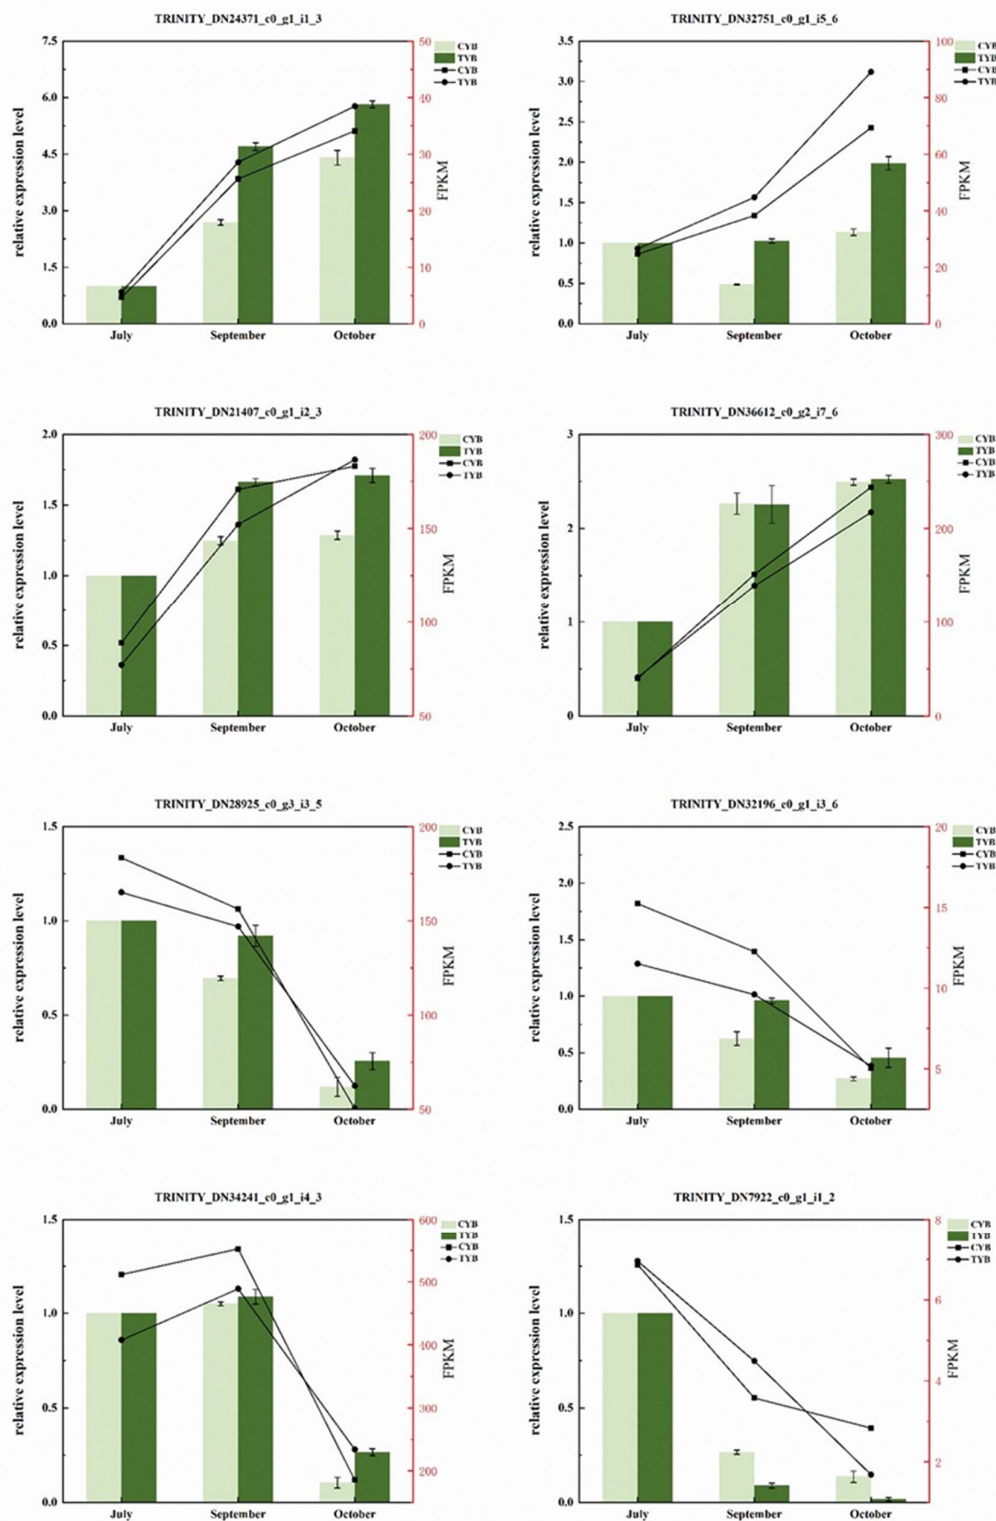

**Figure S1.** qRT-PCR verification of eight DEGs. The bar chart indicates the relative expression level, and the dot plot indicates the FPKM value.
